# Supplementary material
Source: PubMed Central journal article supplement (PMC3037687)
Supplement: supp_M110.179259_jbc.M110.179259-1.pdf [file supp_M110.179259_jbc.M110.179259-1.pdf]

Supplementary Table 1

Table S1

Yeast strains used in this study

| Strain                                                  | Genotype                                                                                                                                                                                                          | Reference       |
|---------------------------------------------------------|-------------------------------------------------------------------------------------------------------------------------------------------------------------------------------------------------------------------|-----------------|
| BY4742                                                  | <i>MAT<math>\alpha</math>, his3 <math>\Delta</math>1, leu2 <math>\Delta</math>0, ura3 <math>\Delta</math>0, lys2 <math>\Delta</math>0, MET15</i>                                                                  | Open Biosystems |
| <i>vms1<math>\Delta</math>::HIS3</i>                    | <i>MAT<math>\alpha</math>, his3 <math>\Delta</math>1, leu2 <math>\Delta</math>0, ura3 <math>\Delta</math>0, lys2 <math>\Delta</math>0, MET15, vms1<math>\Delta</math>::HIS3</i>                                   | This study      |
| <i>vms1<math>\Delta</math>::KanMX</i>                   | <i>MAT<math>\alpha</math>, his3 <math>\Delta</math>1, leu2 <math>\Delta</math>0, ura3 <math>\Delta</math>0, lys2 <math>\Delta</math>0, MET15, vms1<math>\Delta</math>::KanMX</i>                                  | Open Biosystems |
| <i>vms1<math>\Delta</math></i>                          | <i>MAT<math>\alpha</math>/A, his3 <math>\Delta</math>1, leu2 <math>\Delta</math>0, ura3 <math>\Delta</math>0, lys2 <math>\Delta</math>0, MET15, vms1<math>\Delta</math>::KanMX, vms1<math>\Delta</math>::HIS3</i> | This study      |
| <i>ufd2<math>\Delta</math>::KanMX</i>                   | <i>MAT<math>\alpha</math>, his3 <math>\Delta</math>1, leu2 <math>\Delta</math>0, ura3 <math>\Delta</math>0, lys2 <math>\Delta</math>0, MET15, ufd2<math>\Delta</math>::KanMX</i>                                  | Open Biosystems |
| <i>vms1<math>\Delta</math> ufd2<math>\Delta</math></i>  | <i>MAT<math>\alpha</math>, his3 <math>\Delta</math>1, leu2 <math>\Delta</math>0, ura3 <math>\Delta</math>0, lys2 <math>\Delta</math>0, MET15, vms1<math>\Delta</math>::HIS3, ufd2<math>\Delta</math>::KanMX</i>   | This study      |
| <i>ubx1 <math>\Delta</math></i>                         | <i>MAT<math>\alpha</math>, his3 <math>\Delta</math>1, leu2 <math>\Delta</math>0, ura3 <math>\Delta</math>0, lys2 <math>\Delta</math>0, MET15, ubx1<math>\Delta</math>::KanMX</i>                                  | Open Biosystems |
| <i>vms1<math>\Delta</math> ubx1<math>\Delta</math></i>  | <i>MAT<math>\alpha</math>, his3 <math>\Delta</math>1, leu2 <math>\Delta</math>0, ura3 <math>\Delta</math>0, lys2 <math>\Delta</math>0, MET15, vms1<math>\Delta</math>::HIS3, ubx1<math>\Delta</math>::KanMX</i>   | This study      |
| <i>ubx2 <math>\Delta</math></i>                         | <i>MAT<math>\alpha</math>, his3 <math>\Delta</math>1, leu2 <math>\Delta</math>0, ura3 <math>\Delta</math>0, lys2 <math>\Delta</math>0, MET15, ubx2<math>\Delta</math>::KanMX</i>                                  | Open Biosystems |
| <i>vms1<math>\Delta</math> ubx2<math>\Delta</math></i>  | <i>MAT<math>\alpha</math>, his3 <math>\Delta</math>1, leu2 <math>\Delta</math>0, ura3 <math>\Delta</math>0, lys2 <math>\Delta</math>0, MET15, vms1<math>\Delta</math>::HIS3, ubx2<math>\Delta</math>::KanMX</i>   | This study      |
| <i>ubx3 <math>\Delta</math></i>                         | <i>MAT<math>\alpha</math>, his3 <math>\Delta</math>1, leu2 <math>\Delta</math>0, ura3 <math>\Delta</math>0, lys2 <math>\Delta</math>0, MET15, ubx3<math>\Delta</math>::KanMX</i>                                  | Open Biosystems |
| <i>vms1<math>\Delta</math> ubx3<math>\Delta</math></i>  | <i>MAT<math>\alpha</math>, his3 <math>\Delta</math>1, leu2 <math>\Delta</math>0, ura3 <math>\Delta</math>0, lys2 <math>\Delta</math>0, MET15, vms1<math>\Delta</math>::HIS3, ubx3<math>\Delta</math>::KanMX</i>   | This study      |
| <i>ubx4 <math>\Delta</math></i>                         | <i>MAT<math>\alpha</math>, his3 <math>\Delta</math>1, leu2 <math>\Delta</math>0, ura3 <math>\Delta</math>0, lys2 <math>\Delta</math>0, MET15, ubx4<math>\Delta</math>::KanMX</i>                                  | Open Biosystems |
| <i>vms1<math>\Delta</math> ubx4<math>\Delta</math></i>  | <i>MAT<math>\alpha</math>, his3 <math>\Delta</math>1, leu2 <math>\Delta</math>0, ura3 <math>\Delta</math>0, lys2 <math>\Delta</math>0, MET15, vms1<math>\Delta</math>::HIS3, ubx4<math>\Delta</math>::KanMX</i>   | This study      |
| <i>ubx5 <math>\Delta</math></i>                         | <i>MAT<math>\alpha</math>, his3 <math>\Delta</math>1, leu2 <math>\Delta</math>0, ura3 <math>\Delta</math>0, lys2 <math>\Delta</math>0, MET15, ubx5<math>\Delta</math>::KanMX</i>                                  | Open Biosystems |
| <i>vms1<math>\Delta</math> ubx5<math>\Delta</math></i>  | <i>MAT<math>\alpha</math>, his3 <math>\Delta</math>1, leu2 <math>\Delta</math>0, ura3 <math>\Delta</math>0, lys2 <math>\Delta</math>0, MET15, vms1<math>\Delta</math>::HIS3, ubx5<math>\Delta</math>::KanMX</i>   | This study      |
| <i>ubx6 <math>\Delta</math></i>                         | <i>MAT<math>\alpha</math>, his3 <math>\Delta</math>1, leu2 <math>\Delta</math>0, ura3 <math>\Delta</math>0, lys2 <math>\Delta</math>0, MET15, ubx6<math>\Delta</math>::KanMX</i>                                  | Open Biosystems |
| <i>vms1<math>\Delta</math> ubx6<math>\Delta</math></i>  | <i>MAT<math>\alpha</math>, his3 <math>\Delta</math>1, leu2 <math>\Delta</math>0, ura3 <math>\Delta</math>0, lys2 <math>\Delta</math>0, MET15, vms1<math>\Delta</math>::HIS3, ubx6<math>\Delta</math>::KanMX</i>   | This study      |
| <i>ubx7 <math>\Delta</math></i>                         | <i>MAT<math>\alpha</math>, his3 <math>\Delta</math>1, leu2 <math>\Delta</math>0, ura3 <math>\Delta</math>0, lys2 <math>\Delta</math>0, MET15, ubx7<math>\Delta</math>::KanMX</i>                                  | Open Biosystems |
| <i>vms1<math>\Delta</math> ubx7<math>\Delta</math></i>  | <i>MAT<math>\alpha</math>, his3 <math>\Delta</math>1, leu2 <math>\Delta</math>0, ura3 <math>\Delta</math>0, lys2 <math>\Delta</math>0, MET15, vms1<math>\Delta</math>::HIS3, ubx7<math>\Delta</math>::KanMX</i>   | This study      |
| <i>npl4 <math>\Delta</math></i>                         | <i>MAT<math>\alpha</math>, his3 <math>\Delta</math>1, leu2 <math>\Delta</math>0, ura3 <math>\Delta</math>0, lys2 <math>\Delta</math>0, MET15, npl4<math>\Delta</math>::KanMX</i>                                  | Open Biosystems |
| <i>vms1<math>\Delta</math> npl4 <math>\Delta</math></i> | <i>MAT<math>\alpha</math>, his3 <math>\Delta</math>1, leu2 <math>\Delta</math>0, ura3 <math>\Delta</math>0, lys2 <math>\Delta</math>0, MET15, vms1<math>\Delta</math>::HIS3, npl4<math>\Delta</math>::KanMX</i>   | This study      |
| <i>cdc48-3</i>                                          | <i>MAT<math>\alpha</math>, his3 <math>\Delta</math>1, leu2, ura3, lys2 <math>\Delta</math>0, MET15, cdc48-3</i>                                                                                                   | This study      |
| <i>vms1<math>\Delta</math> cdc48-3</i>                  | <i>MAT<math>\alpha</math>, his3 <math>\Delta</math>1, leu2, ura3, lys2 <math>\Delta</math>0, MET15, cdc48-3, vms1<math>\Delta</math>::KanMX</i>                                                                   | This study      |
| <i>pdr5 <math>\Delta</math></i>                         | <i>MAT<math>\alpha</math>, his3 <math>\Delta</math>1, leu2 <math>\Delta</math>0, ura3 <math>\Delta</math>0, lys2 <math>\Delta</math>0, MET15, pdr5<math>\Delta</math>::KanMX</i>                                  | Open Biosystems |
| <i>vms1<math>\Delta</math> pdr5 <math>\Delta</math></i> | <i>MAT<math>\alpha</math>, his3 <math>\Delta</math>1, leu2 <math>\Delta</math>0, ura3 <math>\Delta</math>0, lys2 <math>\Delta</math>0, MET15, vms1<math>\Delta</math>::HIS3, pdr5<math>\Delta</math>::KanMX</i>   | This study      |

Supplementary Table 1. List of strains used in this study. All strains were in the BY4742 background.

Supplementary Table 2  
Table S2

Oligos used in this study

| Oligo                        | Sequence                                                                                        |
|------------------------------|-------------------------------------------------------------------------------------------------|
| <i>VMS1Δ::KanMX-F</i>        | ggattttcaaagatctgcagcctggtgacaagctccaatagcatctgtgcggattttcacaccg                                |
| <i>VMS1Δ::KanMX-R</i>        | gcaaatgctaagaaaaatcctaaaaattgaatatgagatattccagattgtactgagagtgac                                 |
| <i>VMS1Δ::His3-F</i>         | ggattttcaaagatctgcagcctggtgacaagctccaatagcatcggatccccgggtaattaa                                 |
| <i>VMS1Δ::His3-R</i>         | gcaaatgctaagaaaaatcctaaaaattgaatatgagatattccgaattcgagctcgtttaa                                  |
| <i>VMS1</i> screen-F         | ttcttgaggagtgccacag                                                                             |
| <i>VMS1</i> screen-R         | ggcgtcattttcgcggtgag                                                                            |
| <i>ufd2 Δ::His3-F</i>        | ccaatagaaggtaaagttgaccacaagttgtaaggggaaaagtaactttgaaagtagaacccctattccatagatccggatccccgggtaattaa |
| <i>ufd2 Δ::His3-R</i>        | aaatataagacacattgagcgtgaaataagccttattgattagggcaattttgcaatttatctatcacttattcatgaattcgagctcgtttaa  |
| <i>UFD2</i> screen-F         | ccagttcgagaatctagtctg                                                                           |
| <i>UFD2</i> screen-R         | gaagcaaatcgctttccacaa                                                                           |
| <i>UBX1</i> screen-F         | gtagtgacaacatgcctctggat                                                                         |
| <i>UBX1</i> screen-R         | gcagcagttattcatgatgctggt                                                                        |
| <i>UBX2</i> screen-F         | tggctgaggattgccccaagctg                                                                         |
| <i>UBX2</i> screen-R         | actataaaggtagccccagctcc                                                                         |
| <i>UBX3</i> screen-F         | agaccgcctaattggatcatcg                                                                          |
| <i>UBX3</i> screen-R         | aaactgatgcacgtgacactt                                                                           |
| <i>UBX4</i> screen-F         | aagatagcgggagcctcaaccgct                                                                        |
| <i>UBX4</i> screen-R         | gtacaagttacggaaggcggagct                                                                        |
| <i>UBX5</i> screen-F         | ctcgtgctctctgcagaagcga                                                                          |
| <i>UBX5</i> screen-R         | caacagcggcagatgcatcgt                                                                           |
| <i>UBX6</i> screen-F         | ggatttacctctagcgtcaacc                                                                          |
| <i>UBX6</i> screen-R         | aaccaggatttgcacgagcca                                                                           |
| <i>UBX7</i> screen-F         | gtgctgccatatacagcaact                                                                           |
| <i>UBX7</i> screen-R         | gctgagttctttcgcggtgat                                                                           |
| <i>CDC48 -NotI-F1</i>        | ttgcggcccggtggccagccaagaaacgga                                                                  |
| <i>CDC48 -XhoI-R1</i>        | agctcggagacgaccgaggtcctacagcct                                                                  |
| <i>CDC48 -Cterm-BamHI-R1</i> | acggatccactatacaaatcatcatcttcc                                                                  |
| <i>CDC48 -Myc-BamHI-F1</i>   | acggatccGAACAAAACTCATCTCAGAAGAGGATCTGtagtagttatatgccaggtatatttttaaatcg                          |
| <i>CDC48 -HA-BamHI-F1</i>    | acggatccTACCCATACGACGTCCAGACTACGCTtagtagttatatgccaggtatatttttaaatcg                             |
| <i>VMS1 -NotI-F</i>          | ctgcggccgcttcttgaggagtgccacag                                                                   |
| <i>VMS1 -Sall-R</i>          | tcggctcagcggcgtcattttcgcggtgag                                                                  |
| <i>VMS1 -Cterm-BamHI-R1</i>  | acggatccgattttctttcatcctttctctg                                                                 |
| <i>VMS1 -Myc-BamHI-F1</i>    | acggatccGAACAAAACTCATCTCAGAAGAGGATCTGtagtagggaatctcatattcaatttttag                              |
| <i>VMS1 -HA-BamHI-F1</i>     | acggatccTACCCATACGACGTCCAGACTACGCTtagtagggaatctcatattcaatttttag                                 |

Supplementary Table 2. List of oligonucleotide primers used in this study. Restriction enzyme recognition sites are underlined and epitope tags are capitalized.

## Supplementary Table 3

**Table S3****Plasmids used in this study**

| Plasmid name            | Description                                                          | Reference                 |
|-------------------------|----------------------------------------------------------------------|---------------------------|
| pSM1152                 | PGK1 promoter, CFTR-HA expression plasmid, 2 micron                  | Zhang, et al., 2002       |
| pSM1911                 | PGK1 promoter, Ste6p*-HA expression plasmid, 2 micron                | Huyer, et al., 2006       |
| pUB23-Ub-Pro            | GAL promoter, Ubiquitin-Proline $\beta$ galactosidase, 2 micron      | Bachmair, et al., 1986    |
| CPY*-3xHA               | Endogenous promoter, CPY* 3xHA expression plasmid, CEN               | Bhamidipati, et al., 2005 |
| pRS316- <i>CDC48</i>    | Endogenous promoter, untagged <i>CDC48</i> , CEN                     | This study                |
| pRS426- <i>CDC48</i>    | Endogenous promoter, untagged <i>CDC48</i> , 2 micron                | This study                |
| pRS316- <i>CDC48Myc</i> | Endogenous promoter, C-terminal 1xmyc tagged <i>CDC48</i> , CEN      | This study                |
| pRS316- <i>CDC48HA</i>  | Endogenous promoter, C-terminal 1xHA tagged <i>CDC48</i> , CEN       | This study                |
| pRS426- <i>CDC48Myc</i> | Endogenous promoter, C-terminal 1xmyc tagged <i>CDC48</i> , 2 micron | This study                |
| pRS426- <i>VMS1</i>     | Endogenous promoter, untagged <i>VMS1</i> , CEN                      | This study                |
| pRS315- <i>VMS1HA</i>   | Endogenous promoter, C-terminal 1xHA tagged <i>VMS1</i> , CEN        | This study                |
| pRS316- <i>VMS1HA</i>   | Endogenous promoter, C-terminal 1xHA tagged <i>VMS1</i> , CEN        | This study                |
| pRS426- <i>VMS1HA</i>   | Endogenous promoter, C-terminal 1xHA tagged <i>VMS1</i> , 2 micron   | This study                |

Supplementary Table 3. Plasmids used in the study. Unless referenced, all plasmids were constructed by PCR amplification and cloning as detailed in the Experimental Procedures section.

Supplementary Figure S1

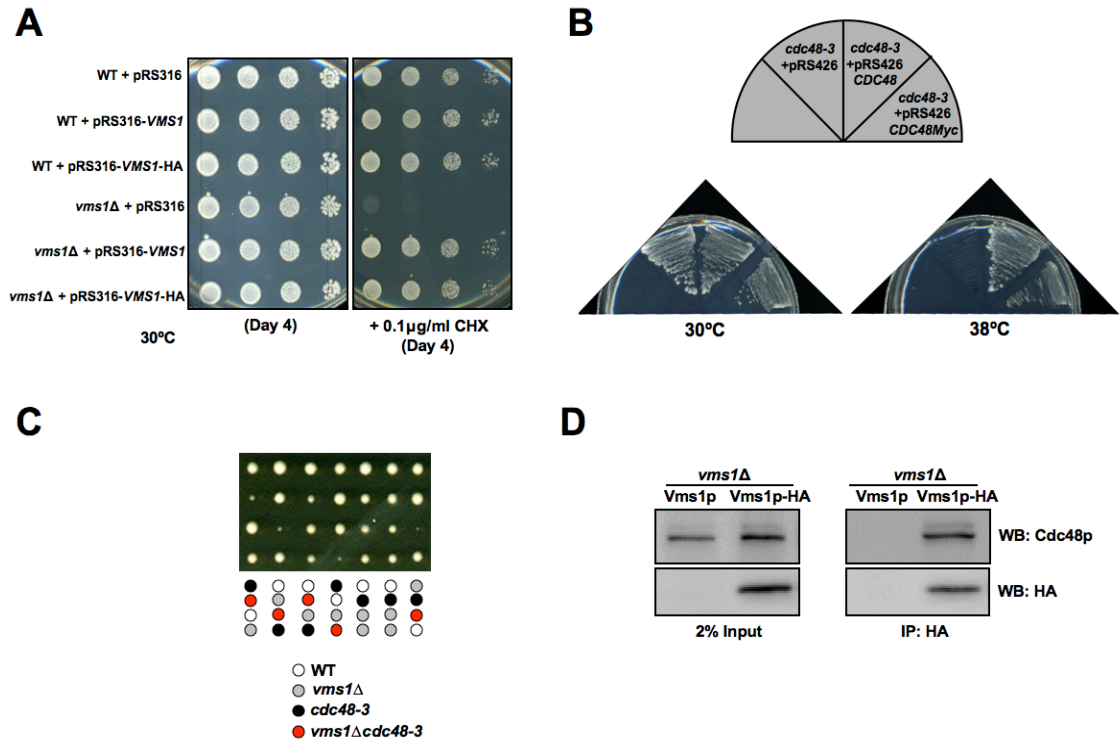

Supplementary Figure S1. *A*. An epitope-tagged form of Vms1p is functional. WT BY4742 and *vms1*Δ strains were transformed with an empty vector or a CEN plasmid containing either the untagged or HA-tagged form of Vms1p. Serial dilutions were spot plated on selective media lacking or containing 0.1 μg/ml cycloheximide. *B*. An epitope-tagged form of Cdc48p is functional. The indicated strains were transformed with an empty vector or untagged or Myc-tagged forms of Cdc48p. Serial dilutions of the transformants were spot plated on selective media and then incubated at 30°C or 38°C. *C*. *VMS1* genetically interacts with a mutant allele of *CDC48*. A temperature sensitive mutant allele of *CDC48*, *cdc48-3*, was genetically crossed with strains lacking the *VMS1* gene. Tetrads were sporulated, dissected, and grown at 30°C. *D*. Cdc48p coimmunoprecipitates with Vms1p from ER-enriched fractions. ER-membranes were prepared as described in the Experimental Procedures, solubilized and immunoprecipitated with anti-HA agarose. Immunoprecipitates were resolved by SDS-PAGE and immunoblotted for anti-HA and Anti-Cdc48p.

Supplementary Figure S2

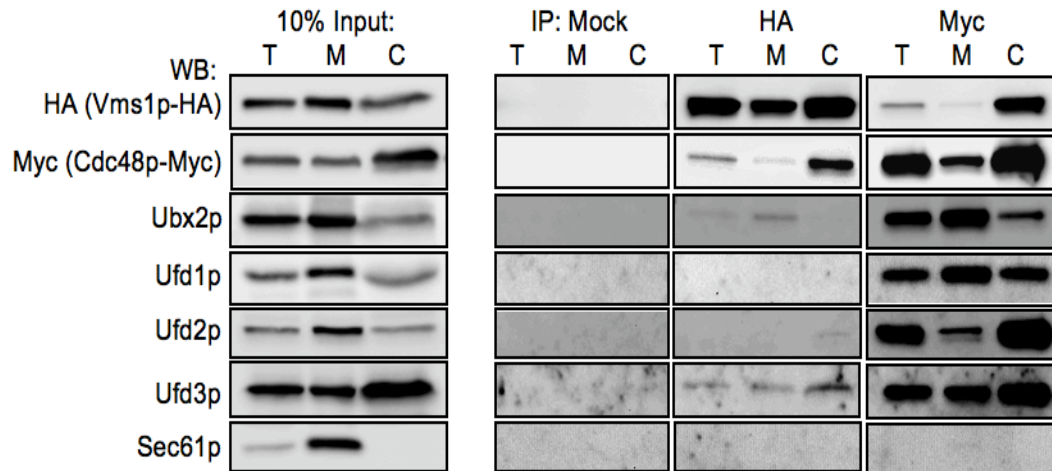

Supplementary Figure S2. Vms1p physically associates with other members of the Cdc48p complex. Total lysate (T), membrane (M), and cytosolic (C), fractions were prepared from cells expressing Vms1p-HA from a 2 $\mu$  plasmid the under control of its endogenous promoter. Vms1p-HA was immunoprecipitated with anti-HA agarose and Cdc48p-Myc was immunoprecipitated with anti-Myc agarose as described in the Experimental Procedures. Immunoprecipitated material was resolved by SDS-PAGE followed by immunoblot analysis with the indicated antibodies.

Supplementary Figure S3

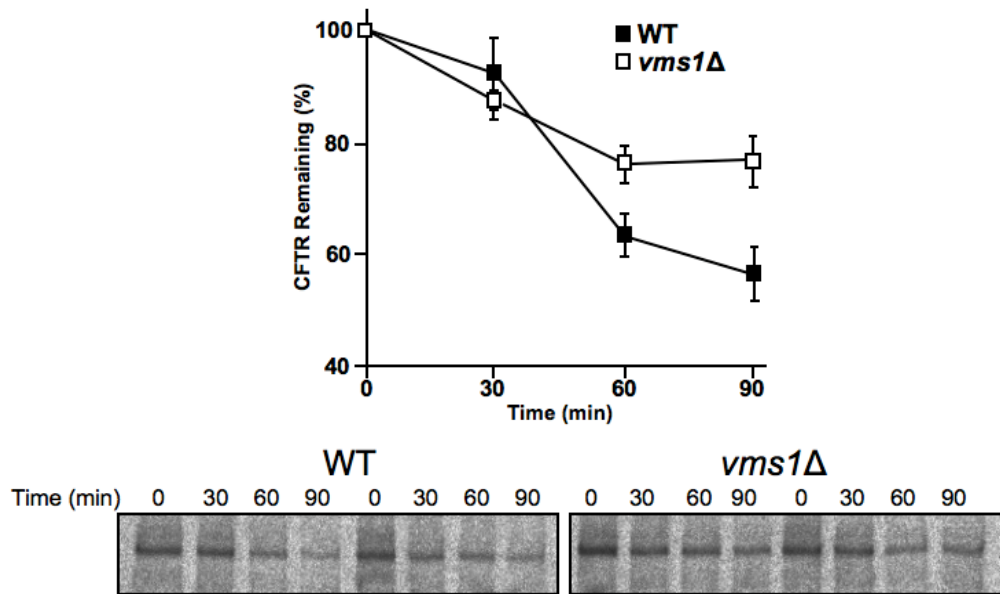

Supplementary Figure S3. Loss of *VMS1* affects the ERAD of CFTR as assessed by pulse-chase analysis. Wild type and *vms1Δ* cells expressing CFTR-HA were radio-labeled for 1 hour and chased with cold methionine and cysteine. The indicated time points were taken, the cells were lysed and CFTR-HA was immunoprecipitated with anti-HA agarose. The immunoprecipitate was resolved on a 10% SDS-polyacrylamide gel and subject to radiography. Data were quantitated relative to the zero time point. N = 10, +/- SEM. Wild-type (WT) cells are denoted by the filled squares and *vms1Δ* cells are represented by the unfilled squares.

Supplementary Figure S4

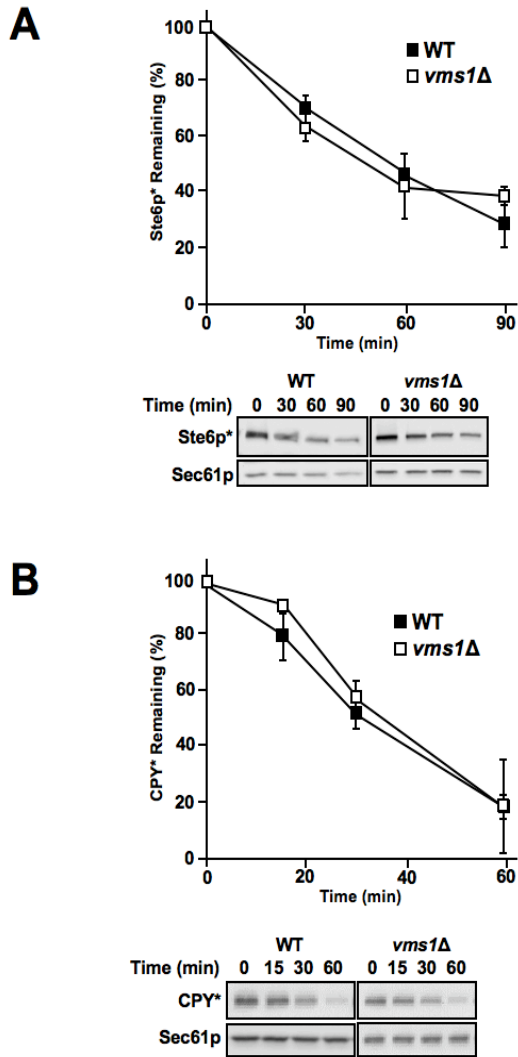

Supplementary Figure S4. Loss of *VMS1* has no effect on the degradation of two other model ERAD substrates, (A.) Ste6p\* and (B.) CPY\*, as assessed by cycloheximide chase. For both (A.) and (B.), wild-type is represented by filled squares and *vms1Δ* is represented by open squares.

Supplementary Figure S5

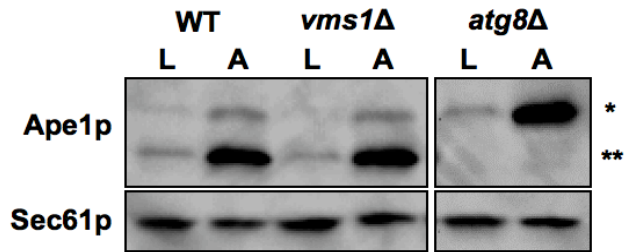

**L: Log-phase**

**A: Nitrogen starvation/Autophagic induction**

**\* Unprocessed Ape1p**

**\*\* Processed Ape1p**

Supplementary Figure S5. Strains lacking *VMS1* do not exhibit a defect in the Cytoplasmic-to-Vacuole Transport (CVT) pathway. Wild-type (WT), *vms1Δ*, and *atg8Δ* cells were grown in rich medium or in nitrogen-poor medium. Total lysates were prepared, and equal amounts of lysate were separated by SDS-PAGE for immunoblotting with a marker of CVT activity, Ape1p. Sec61p was analyzed as a loading control.



Supplementary Figure S6

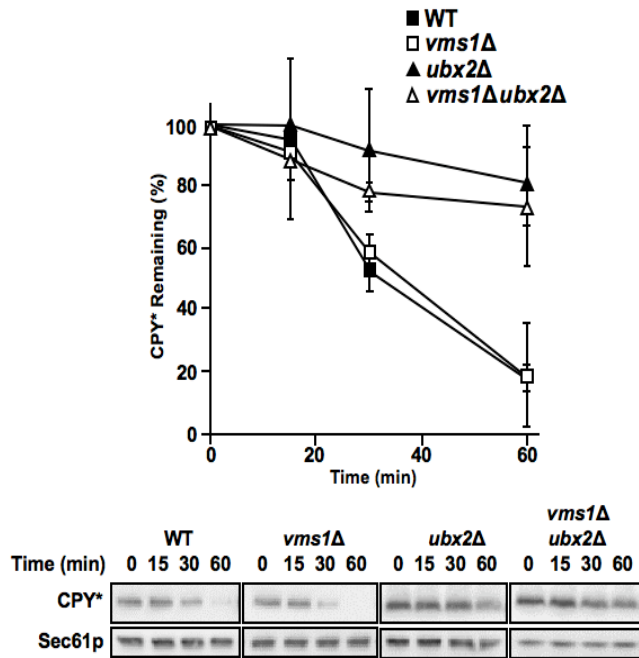

Supplementary Figure S6. The simultaneous loss of *UBX2* and *VMS1* does not result in a synthetic ERAD defect for CPY\*. Wild-type is denoted by filled squares, *vms1Δ* by open squares, *ubx2Δ* by filled triangles, and *vms1Δubx2Δ* by open triangles.

Supplementary Figure S7

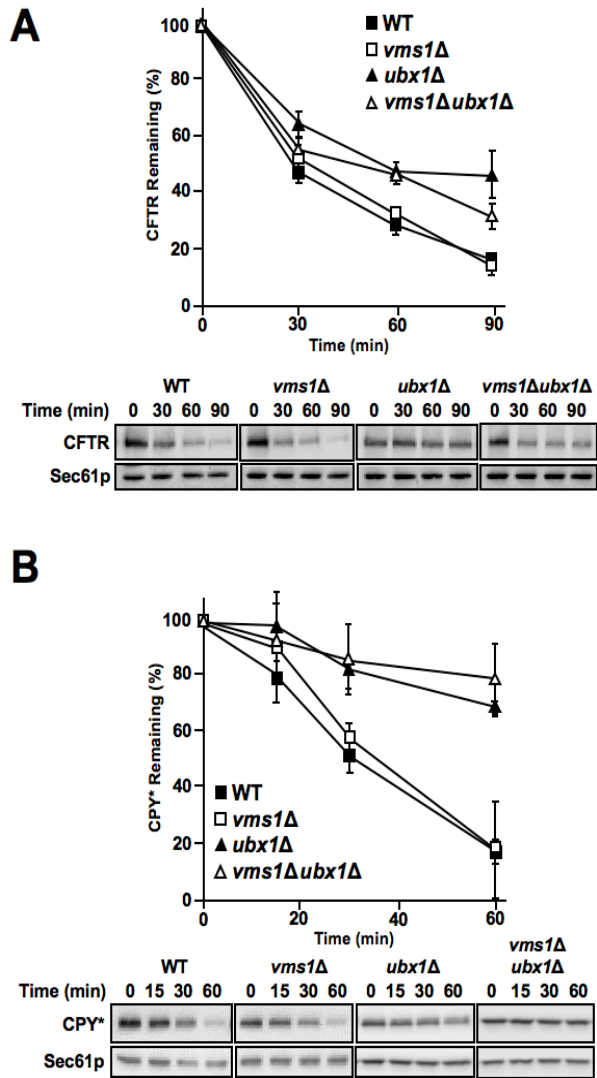

Supplementary Figure S7. The loss of *UBX1* results in an ERAD defect for CFTR and CPY\*. For (A.) and (B.), wild-type is denoted by filled squares, *vms1*Δ by open squares, *ubx1*Δ by filled triangles, and *vms1*Δ*ubx1*Δ by open triangles.

Supplementary Figure S8

**A**

| Strain        | Ste6p* |                 |
|---------------|--------|-----------------|
|               | Single | + <i>vms1</i> Δ |
| <i>ubx1</i> Δ | -      | +               |
| <i>ubx2</i> Δ | -      | -               |
| <i>ubx3</i> Δ | -      | -               |
| <i>ubx4</i> Δ | -      | -               |
| <i>ubx5</i> Δ | -      | -               |
| <i>ubx6</i> Δ | -      | -               |
| <i>ubx7</i> Δ | -      | -               |
| <i>ufd2</i> Δ | +      | +               |

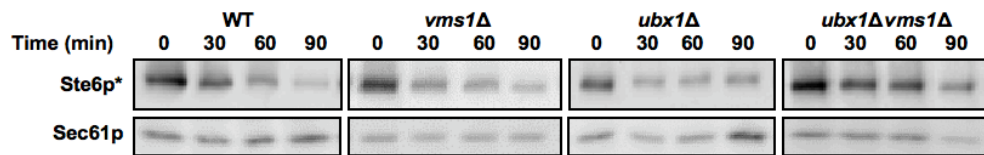

**B**

| Strain        | CPY*   |                 |
|---------------|--------|-----------------|
|               | Single | + <i>vms1</i> Δ |
| <i>ubx1</i> Δ | +      | +               |
| <i>ubx2</i> Δ | +      | +               |
| <i>ubx3</i> Δ | -      | -               |
| <i>ubx4</i> Δ | -      | +               |
| <i>ubx5</i> Δ | -      | -               |
| <i>ubx6</i> Δ | -      | -               |
| <i>ubx7</i> Δ | -      | -               |
| <i>ufd2</i> Δ | -      | -               |

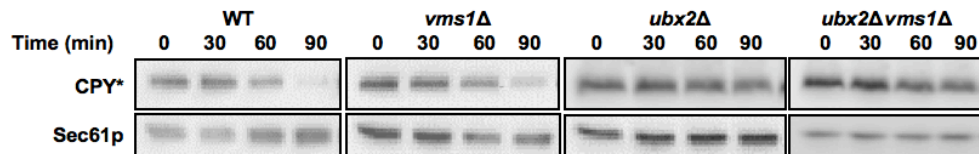

Supplementary Figure S8. A summary of degradation assays for the ERAD substrates Ste6p\* (*A*) and CPY\* (*B*). Strains listed in the tables in (*A*) and (*B*) were transformed with a plasmid engineered to express Ste6p\*-HA or the CPY\*-HA, respectively. Cycloheximide chase analyses were performed and data were quantitated relative to the zero time point. Beneath each table are representative images from select experiments.

Supplementary Figure S9

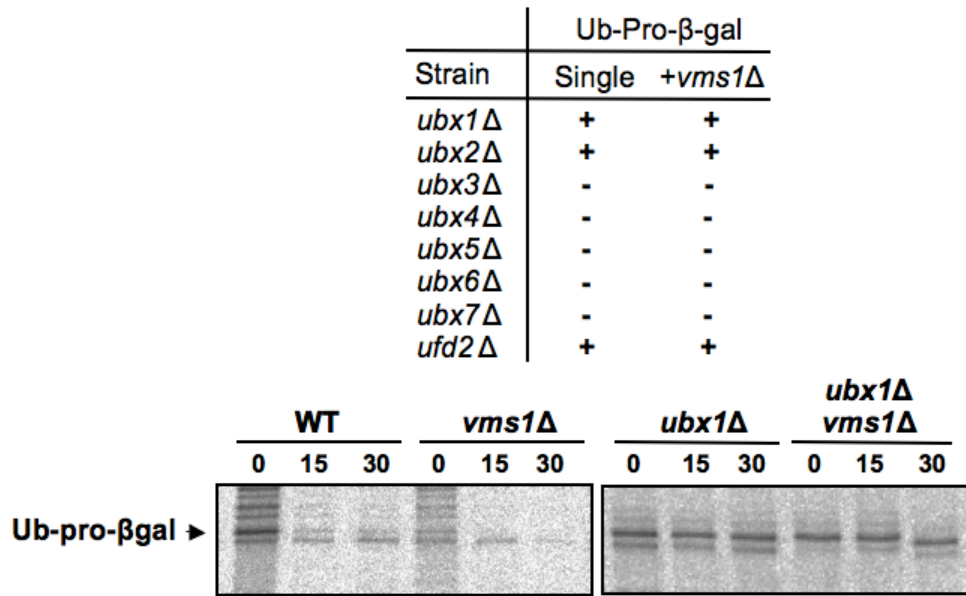

Supplementary Figure S9. A summary of degradation assays for the N-end rule substrate, Ub-Pro- $\beta$ -gal. A radio-labeling pulse cycloheximide chase was performed and data were quantitated relative to the zero time point. A representative image corresponding to a select experiment is shown.
